# Supplementary material
Source: publisher site journal article supplement (https://www.dovepress.com/article/291920)
Supplement: Supplementary file 1 [file get_supplementary_file.php]

**SUPPLEMENTARY DATA**

**Therapeutic success of tiotropium/olodaterol, measured using the Clinical COPD Questionnaire (CCQ), in routine clinical practice: a multinational non-interventional study**

Arschang Valipour1, Sergey Avdeev,2 Adam Barczyk,3 Valentina Bayer,4 Zvi Fridlender,5 Mariela Georgieva,6 Ondřej Kudela,7 Alexey Medvedchikov,8 Ramona Miron,9 Maria Sanzharovskaya,8 Virginija Šileikienė,10 Jurij Šorli,11 Marc Spielmanns,12 Zsuzsanna Szalai13

1Karl-Landsteiner-Institute for Lung Research and Pulmonary Oncology, Klinik Floridsdorf, Vienna, Austria; 2I.M. Sechenov First Moscow State Medical University (Sechenov University), Moscow, Russia; 3Wydział Nauk Medycznych Śląskiego Uniwersytetu Medycznego, Katowice, Poland; 4Boehringer Ingelheim Pharmaceuticals, Inc., Ridgefield, CT, USA; 5Hadassah-Hebrew University Medical Center, Jerusalem, Israel; 6Medical Center "Sv.Ivan Rilski" OOD, Vidin, Bulgaria; 7Department of Pneumology, University Hospital Hradec Kralove, Charles University in Prague, Faculty of Medicine in Hradec Kralove, Hradec Kralove, Czech Republic; 8Boehringer Ingelheim RCV GmbH & Co. KG, Vienna, Austria; 9Clinical Pneumophtysiology Hospital Iasi, Iasi, Romania; 10Clinic of Chest Diseases, Immunology and Allergology, Institute of Clinical Medicine, Faculty of Medicine, Vilnius University, Vilnius, Lithuania; 11Bolnišnica Topolšica, Topolšica, Slovenia; 12Zürcher RehaZentrum Wald, Wald, Switzerland; 13Petz Aladar County Teaching Hospital, Gyor, Hungary

**Supplementary Text S1**

The study was submitted to the ethics committee of participating countries according to national regulations. Sites could only participate if independent ethics committee approval in their country was issued. Written informed consent was required by all study subjects prior to participation. Approvals were as follows: Bulgaria (Republic of Bulgaria Ministry of Health Ethical Commission for Clinical Trials; positive vote on 20 March 2019), Czech Republic (no approval needed), Hungary (Medical Research Council Scientific and Research Ethics Commission; positive vote on 29 August 2018), Israel (Meir Medical Center Helsinki Committee; positive vote separately for each site; first approval on 06 November 2018), Lithuania (Lithuanian Bioethics Committee; positive vote on 07 August 2018), Poland (no approval needed, acknowledgement of notification on 10 July 2018), Romania (National Commission for Bioethics of Medicines and Medical Devices; positive vote on 19 January 2016), Russia (Independent Interdisciplinary Committee on Ethical Review of Clinical Trials; positive vote of the main ethics committee on 24 August 2018), Slovenia (Commission of the Republic of Slovenia for Medical Ethics; positive vote on 23 July 2018), Switzerland (Cantonal Ethics Committee of Zurich; positive vote on 27 November 2018) and Ukraine (Ethics Commission at the Lviv Municipal Institution regional council; positive vote separately for each site; first approval on 24 September 2018).

**Supplementary Table S1: Visit flow chart and data collection parameters**

| **Parameter** | **Visit 1; baseline visit** | **Visit 2; approx. 6 weeks after baseline visit** |
| --- | --- | --- |
| Informed consent | X |  |
| Inclusion/exclusion criteria | X |  |
| Patient demographics (age, gender, height, and weight) | X |  |
| Start of COPD | X |  |
| Number of exacerbations in the last 12 months | X |  |
| Number of exacerbations leading to hospitalization in the last 12 months | X |  |
| mMRC breathlessness scale, completed by the patient | X |  |
| Past COPD therapies (6 weeks before Visit 1) | X |  |
| Respimat® training (yes/no) | X |  |
| COPD severity based on GOLD assessmenta | X |  |
| GOLD spirometric classification, if availableb | X |  |
| Smoking status/history | X | X |
| Concomitant diseases/comorbidities | X | X |
| COPD-related and other relevant concomitant medication | X | X |
| Health and functional status by CCQ questionnaire, completed by patient | X | X |
| Patient-reported daily average number of puffs per day of COPD rescue medication (eg, SABA, such as salbutamol) at the week before Visit 1 and the week before Visit 2 | X | X |
| General condition of patient evaluated by PGE, completed by the physician | X | X |
| Safety: adverse drug reactions (serious and non-serious), fatal adverse events, pregnancy | X | X |
| Patient satisfaction with tiotropium/olodaterol Respimat®, completed by the patient |  | X |
| Rationale for tiotropium/olodaterol Respimat®treatment discontinuation (if applicable) |  | X |
| Continuation or discontinuation of treatment with tiotropium/olodaterol Respimat®after the study (yes/no) |  | X |

aGOLD patient group (B, C or D) was automatically calculated within the eCRF based on available exacerbation history and mMRC. bGOLD stage 1–4 spirometric classification of airflow limitation based on post-bronchodilator FEV1 if available.

CCQ, Clinical COPD Questionnaire; COPD, chronic obstructive pulmonary disease; eCRF, electronic case report form; FEV1, forced expiratory volume in 1 second; GOLD, Global Initiative for Chronic Obstructive Lung Disease; mMRC, modified Medical Research Council; PGE, Physician’s Global Evaluation; SABA, short-acting β2-agonist.

**Supplementary Table S2: Absolute reductions in CCQ domain scores, stratified by treatment pathway (full analysis set)**

| **CCQ domain** | **Treatment group** | **n** | **Mean reduction** | **95% CI** | **SD** |
| --- | --- | --- | --- | --- | --- |
| Total score | Treatment-naïve | 2,678 | 1.17 | 1.13–1.20 | 0.92 |
| Pretreated (LABA only, LAMA only) | 1,322 | 0.78 | 0.74–0.82 | 0.73 |
| Pretreated (LABA/ICS) | 523 | 0.95 | 0.88–1.03 | 0.83 |
| Symptom | Treatment-naïve | 2,678 | 1.26 | 1.22–1.29 | 1.01 |
| Pretreated (LABA only, LAMA only) | 1,322 | 0.83 | 0.79–0.88 | 0.83 |
| Pretreated (LABA/ICS) | 523 | 1.01 | 0.92–1.09 | 0.99 |
| Functional state | Treatment-naïve | 2,678 | 1.07 | 1.04–1.11 | 1.02 |
| Pretreated (LABA only, LAMA only) | 1,322 | 0.72 | 0.68–0.76 | 0.80 |
| Pretreated (LABA/ICS) | 523 | 0.88 | 0.80–0.95 | 0.91 |
| Mental state | Treatment-naïve | 2,678 | 1.17 | 1.12–1.22 | 1.27 |
| Pretreated (LABA only, LAMA only) | 1,322 | 0.81 | 0.75–0.87 | 1.08 |
| Pretreated (LABA/ICS) | 523 | 1.00 | 0.90–1.10 | 1.14 |

CCQ, Clinical COPD Questionnaire; CI, confidence interval; ICS, inhaled corticosteroids; LABA, long-acting β2-agonist; LAMA, long-acting muscarinic antagonist; SD, standard deviation.

Due to the low number of patients who switched from pre-existing treatments to a combination of tiotropium/olodaterol plus a separate ICS, this group was excluded from the subgroup analysis. Patients on other prior therapies were also excluded.

**Supplementary Table S3: Change in general condition of the patient, evaluated using the PGE, between baseline and Week 6, stratified by treatment pathway (full analysis set)**

| **PGE score** | **Treatment-naïve (%)**  **(n=2,678)** | | **Pretreated (LABA only, LAMA only) (%)**  **(n=1,322)** | | **Pretreated (LABA/ICS) (%)**  **(n=523)** | |
| --- | --- | --- | --- | --- | --- | --- |
| **Baseline** | **Week 6** | **Baseline** | **Week 6** | **Baseline** | **Week 6** |
| 1 | 1.19 | 0.11 | 0.76 | 0 | 0.19 | 0 |
| 2 | 11.61 | 0.93 | 6.81 | 0.68 | 8.99 | 1.72 |
| 3 | 25.91 | 3.66 | 22.01 | 4.39 | 26.39 | 8.60 |
| 4 | 30.58 | 14.04 | 29.88 | 13.84 | 30.98 | 13.19 |
| 5 | 17.66 | 27.04 | 20.88 | 25.04 | 20.65 | 23.52 |
| 6 | 10.31 | 30.92 | 14.90 | 31.69 | 10.13 | 31.55 |
| 7 | 2.35 | 18.71 | 4.46 | 20.80 | 2.68 | 17.40 |
| 8 | 0.37 | 4.59 | 0.30 | 3.56 | 0 | 3.82 |
| Missing | 0 | 0 | 0 | 0 | 0 | 0.19 |

Due to the low number of patients who switched from pre-existing treatments to a combination of tiotropium/olodaterol plus a separate ICS, this group was excluded from the subgroup analysis. Patients on other prior therapies were also excluded.

ICS, inhaled corticosteroids; LABA, long-acting β2-agonist; LAMA, long-acting muscarinic antagonist; PGE, Physician’s Global Evaluation.

**Supplementary Table S4: Change in average daily use of rescue medication between the week before baseline and the week before Week 6, all patients and stratified by treatment pathway (full analysis set)**

|  | **Mean decrease in patient-reported puffs/day** | **95% CI** | **SD** |
| --- | --- | --- | --- |
| All patients  (n=4,700) | 1.25 | 1.19–1.31 | 2.14 |
| Treatment-naïve (n=2,678) | 1.38 | 1.29–1.47 | 2.33 |
| Pretreated (LABA only, LAMA only) (n=1,322) | 1.01 | 0.92–1.11 | 1.78 |
| Pretreated (LABA/ICS)  (n=523) | 1.17 | 1.01–1.33 | 1.89 |

Due to the low number of patients who switched from pre-existing treatments to a combination of tiotropium/olodaterol plus a separate ICS, this group was excluded from the subgroup analysis. Patients on other prior therapies were also excluded.

CI, confidence interval; ICS, inhaled corticosteroids; LABA, long-acting β2-agonist; LAMA, long-acting muscarinic antagonist; SD, standard deviation.

**Supplementary Table S5. Summary of adverse events**

|  | | **N** | **%** |
| --- | --- | --- | --- |
| Number of patients |  | 4819 | 100 |
| Patients with investigator-defined AE |  | 36 | 0.74 |
| Patients with investigator-defined drug-related AE |  | 29 | 0.60 |
| Patients with investigator-defined drug-related AE leading to discontinuation of trial drug |  | 19 | 0.39 |
| Patients with serious AE* |  | 7 | 0.15 |
| Reason for seriousness | Results in death | 7 | 0.15 |
| Immediately life threatening | 2 | 0.04 |
| Hospitalization required/prolonged | 1 | 0.02 |
| Patients with serious AE leading to discontinuation |  | 3 | 0.06 |

AE, adverse event.

*Only serious adverse events leading to a fatal outcome were collected.

**Supplementary Figure S1: Patient satisfaction with tiotropium/olodaterol and device, all patients and stratified by treatment pathway (full analysis set)**


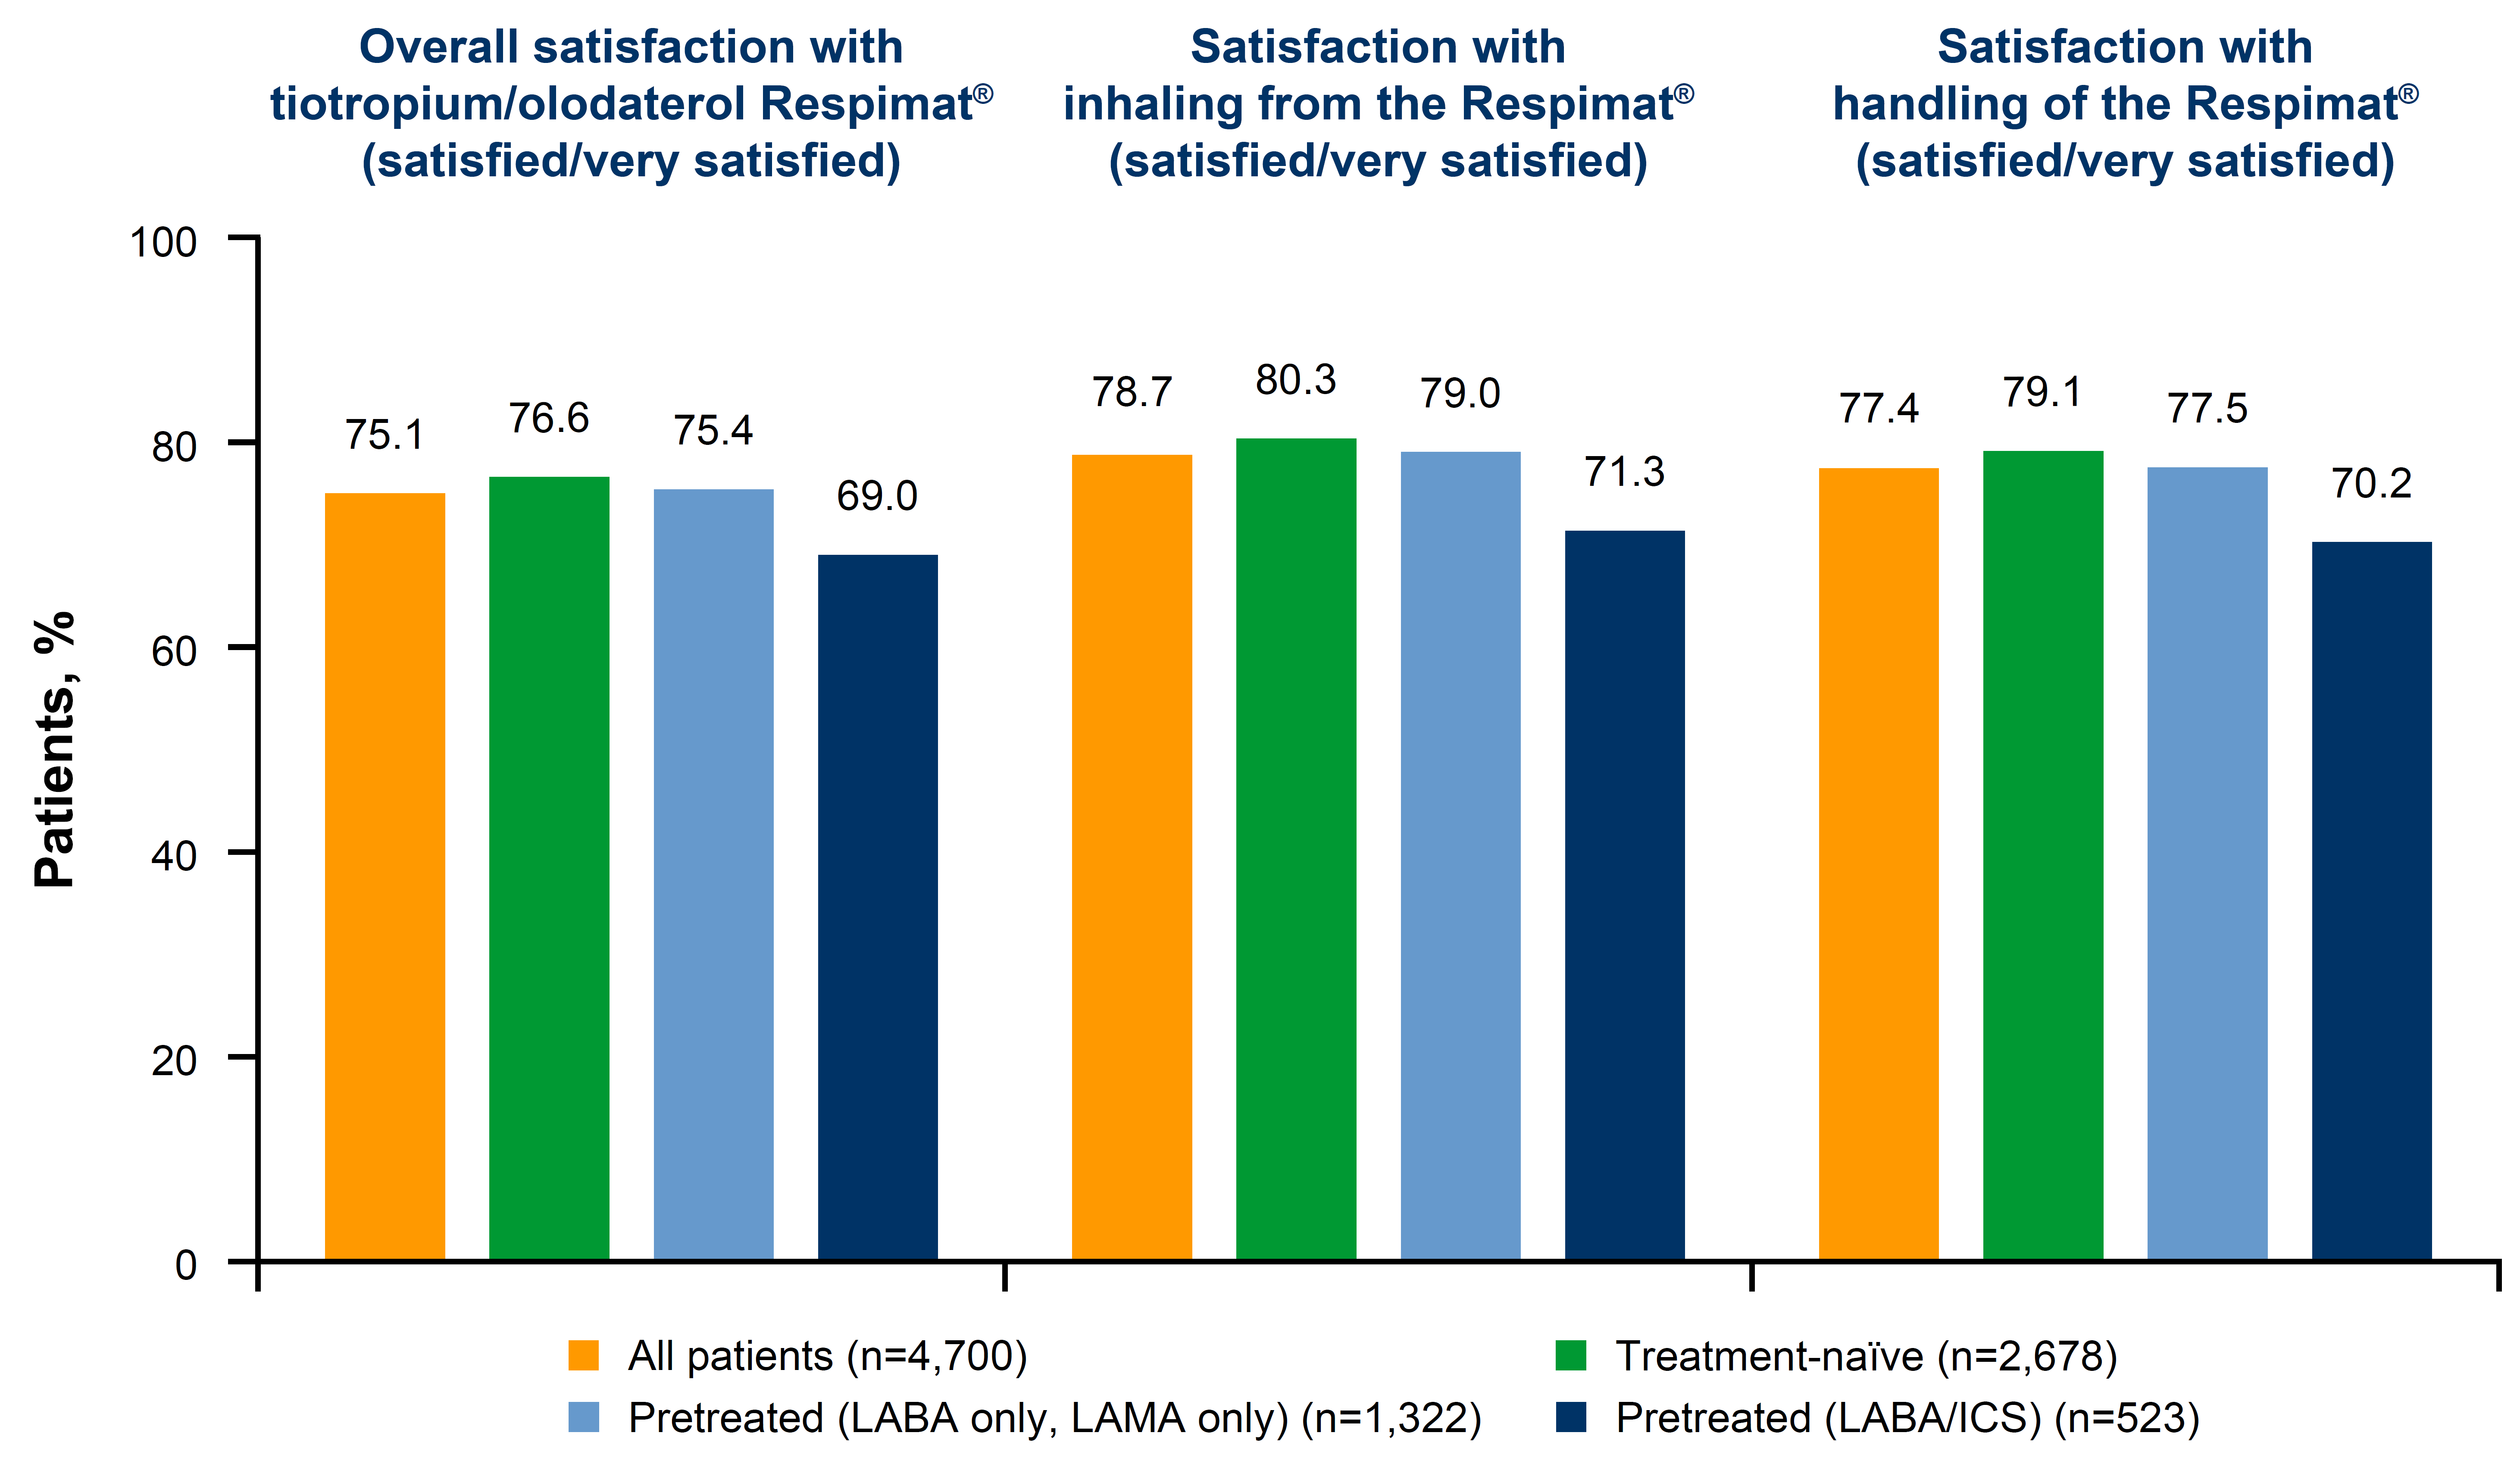


Due to the low number of patients who switched from pre-existing treatments to a combination of tiotropium/olodaterol plus a separate ICS, this group was excluded from the subgroup analysis. Patients on other prior therapies were also excluded.

ICS, inhaled corticosteroids; LABA, long-acting β2-agonist; LAMA, long-acting muscarinic antagonist.
